# Supplementary material for: Quality of Life, Needs and Fears of Mothers of Children with Disabilities in Saudi Arabia during the COVID-19 Lockdown
Source: MDPI journal article supplement (doi:10.3390/ijerph182111442), 2021-10-30
Supplement: s1 [file s1]

**Supplement:****Table S1. Sample Size Calculation**

Population size(for finite population correction factor or fpc)(N): 667280  
 Hypothesized % frequency of outcome factor in the population (p):33%+/-5  
 Confidence limits as % of 100(absolute +/- %) (d): 5%  
 Design effect (for cluster surveys-DEFF): 1

**Sample Size(n) for Various Confidence Levels**

| ConfidenceLevel(%) | Sample Size |
|--------------------|-------------|
| 95%                | 340         |
| 80%                | 146         |
| 90%                | 240         |
| 97%                | 417         |
| 99%                | 587         |
| 99.9%              | 957         |
| 99.99%             | 1337        |

**Equation**

Sample size  $n = [DEFF * Np(1-p)] / [(d^2 / Z^2_{1-\alpha/2} * (N-1) + p*(1-p)]$  [14]

Results from OpenEpi, Version 3, open source calculator--SSPropor  
 Print from the browser with ctrl-P  
 or select text to copy and paste to other programs.
